# Supplementary material for: Flexible network community organization during the encoding and retrieval of spatiotemporal episodic memories
Source: PubMed Central journal article supplement (PMC6777981; doi:10.1162/netn_a_00102), 2019-09-01
Supplement: netn-03-1070-s001.pdf [file netn-03-1070-s001.pdf]

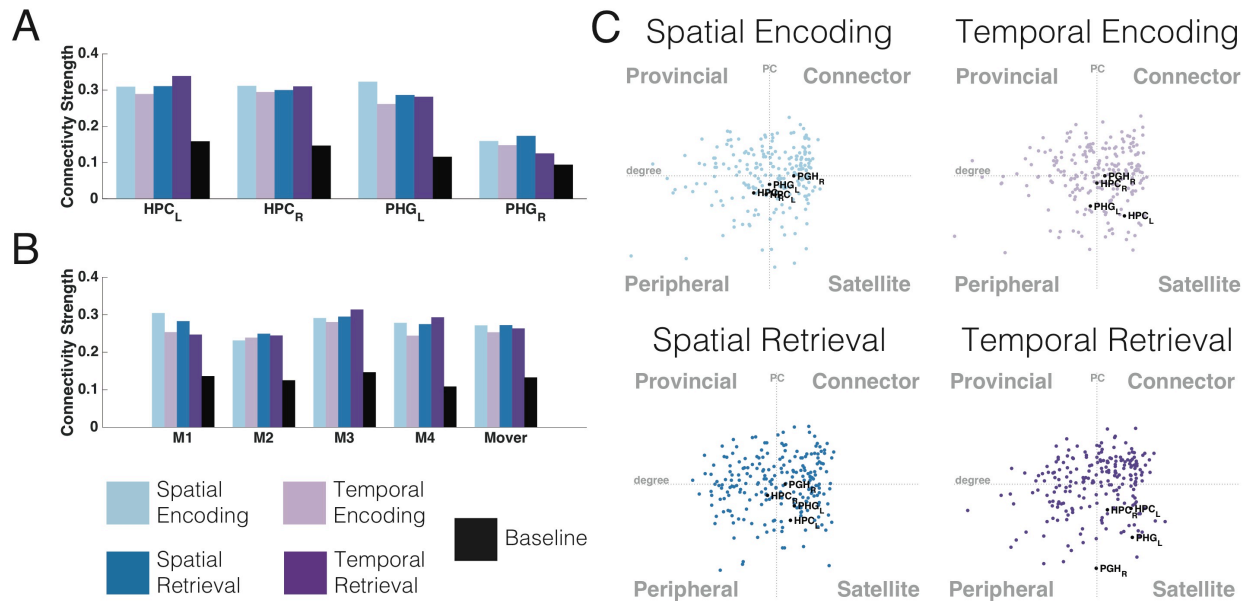

**Figure SI 1: Role of the MTL in spatiotemporal encoding and retrieval**

A) We calculated the connectivity strength of all edges connected to a single region (average edge weight) for the MTL nodes (left and right hippocampi and parahippocampal gyrii) for five conditions (spatial encoding, temporal encoding, spatial retrieval, temporal retrieval, baseline). B) We then averaged the connectivity strength for all four MTL nodes across all edges connected to the nodes belonging to the five modules identified in Figure 2 for all five conditions. C) The z-scored degree centrality and z-scored participation was calculated for all nodes in the four networks (spatial encoding – top left, temporal encoding – top right, spatial retrieval – bottom left, temporal retrieval – bottom right) and plotted, where each colored dot represents a node. We plotted the four MTL nodes in black and labeled nodes that fell into each quadrant as connector, satellite, peripheral, or provincial.

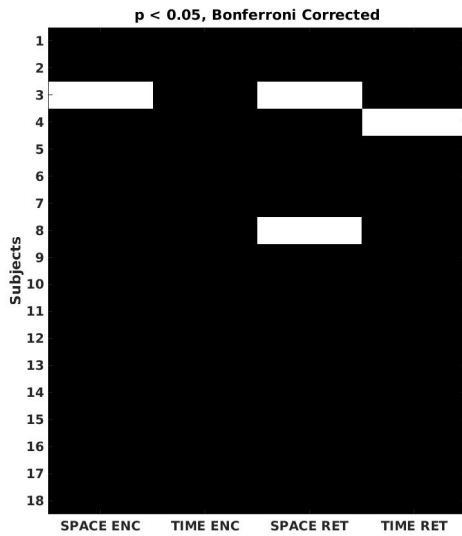

**Figure SI 2:** *Univariate activation compared to connectivity strength of mover ROIs*

We conducted a univariate analysis of the following contrasts for each subject: space encoding (SPACE ENC) > baseline, time encoding (TIME ENC) > baseline, space retrieval (SPACE RET) > baseline, time retrieval (TIME RET) > baseline. Then, we averaged the beta estimates across all voxels within each ROI to produce an average activity estimate for each mover region for the four conditions for each participant. We then averaged the correlation values from the individual participant adjacency matrix for each mover region, thus producing a single value for "strength of connectivity" for each mover ROI for each condition. Finally, we correlated the univariate activations for each region with the corresponding connectivity patterns for each participant and each condition. Almost none of these correlations were significant across participants (white rectangles indicate  $p < 0.05$ , Bonferroni corrected). The few that were significant showed no consistency by condition, possibly indicating false positives. The correlation values, when averaged across participants, were below 0.1.

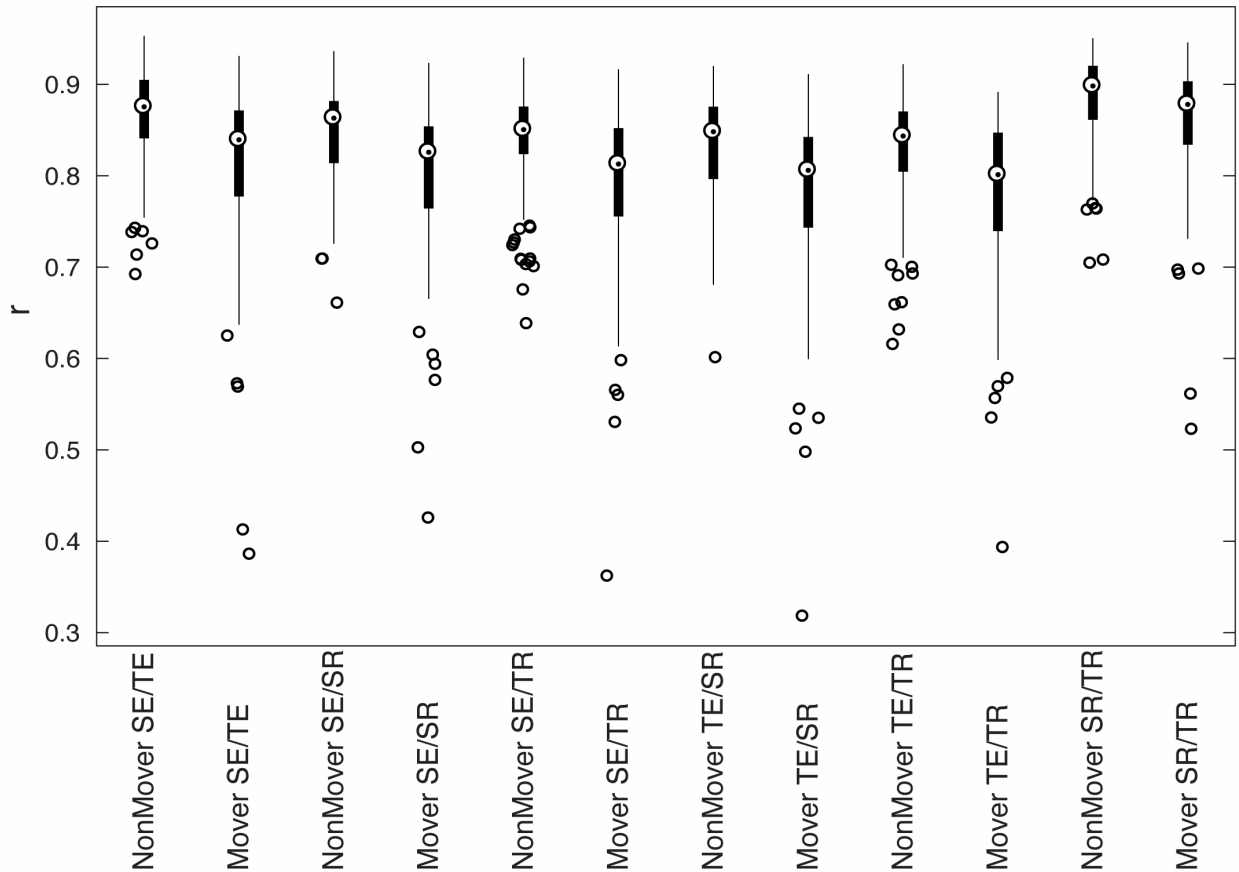

**Figure SI 3:** Comparison of connectivity profiles of mover and non-mover nodes across tasks  
 To see if movers significantly change the regions that they are most strongly connected to in different tasks, we correlated the connectivity vector of each node for each pairwise combination of tasks (spatial encoding (SE)/temporal encoding (TE), spatial encoding/spatial retrieval (SR), spatial encoding/temporal retrieval (TR), temporal encoding/spatial retrieval, temporal encoding/temporal retrieval, spatial retrieval/temporal retrieval) and considered the mover and non-mover nodes separately. On average, mover nodes showed a lower correlation than the non-mover nodes; this was supported by the results from a two-way ANOVA (node type X task) on the correlation (r) values derived from the connectivity vectors, which revealed a main effect of group ( $F(1,1326) = 149.69$ ,  $p < 0.001$ ; mover:  $M = 0.80$ ,  $SD = 0.10$ , non-mover:  $M = 0.85$ ,  $SD = 0.06$ ). The connectivity profiles of the mover nodes were more dissimilar between tasks compared to the non-mover nodes, which suggests that those nodes are meaningfully changing their connectivity profile, rather than being an artifact of the Louvain method. In addition, there was also a main effect for task comparison ( $F(5,1326) = 24.99$ ,  $p < 0.001$ ), suggesting additional variability across task, but no significant interaction ( $F(5,1326) = 0.89$ ,  $p > 0.05$ ).

## Space Retrieval

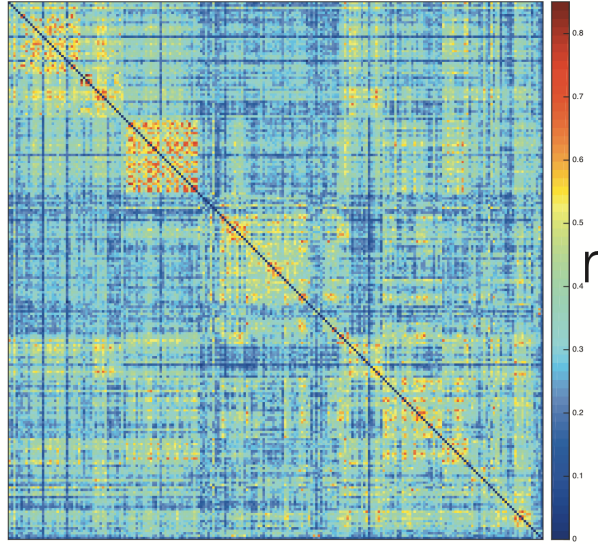

## Time Retrieval

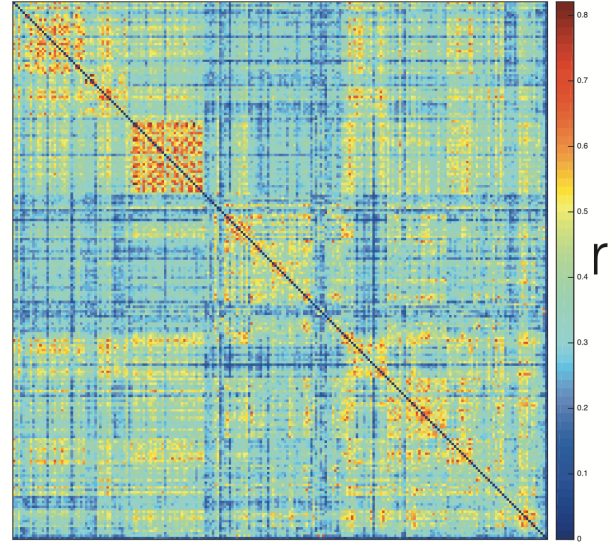

**Figure SI 4:** *Group-level connectivity matrices during retrieval*

The group-level connectivity matrices for the spatial retrieval (left panel) and temporal retrieval (right panel) are shown.

| RSN - AAL Location            | Module | Node Identity  |               |                 |                |
|-------------------------------|--------|----------------|---------------|-----------------|----------------|
|                               |        | Space Encoding | Time Encoding | Space Retrieval | Time Retrieval |
| SMN-Prec_L                    | M2     | Satellite      | Provincial    | Provincial      | Provincial     |
| SMN-MCC_L                     | M2     | Satellite      | Satellite     | Peripheral      | Satellite      |
| SMN-SMA_L/MCC_L/MCC_R         | M2     | Connector      | Connector     | Provincial      | Provincial     |
| SMN-SMA_R/MCC_R               | M2     | Peripheral     | Satellite     | Peripheral      | Peripheral     |
| SMN-ParaCL_L                  | M2     | Satellite      | Satellite     | Peripheral      | Peripheral     |
| SMN-ParaCL_L                  | M2     | Peripheral     | Peripheral    | Peripheral      | Peripheral     |
| SMN-PreCG_R/PostCG_R/ParaCL_R | M2     | Provincial     | Peripheral    | Peripheral      | Peripheral     |
| SMN-PostCG_L/IPL_L/Smar_L     | M2     | Peripheral     | Peripheral    | Peripheral      | Provincial     |
| SMN-PreCG_R                   | M2     | Peripheral     | Peripheral    | Peripheral      | Peripheral     |
| SMN-PostCG_R/Prec_R/ParaCL_R  | M2     | Peripheral     | Provincial    | Peripheral      | Peripheral     |
| SMN-PostCG_L                  | M2     | Provincial     | Provincial    | Provincial      | Provincial     |
| SMN-PreCG_L/PostCG_L          | M2     | Peripheral     | Provincial    | Provincial      | Provincial     |
| SMN-PostCG_R                  | M2     | Provincial     | Provincial    | Provincial      | Provincial     |
| SMN-PreCG_R/PostCG_R          | M2     | Provincial     | Peripheral    | Peripheral      | Provincial     |
| SMN-PreCG_L/PostCG_L          | M2     | Peripheral     | Peripheral    | Peripheral      | Peripheral     |
| SMN-PreCG_R                   | M2     | Connector      | Connector     | Provincial      | Provincial     |
| SMN-PreCG_R/MFG_R             | M2     | Provincial     | Provincial    | Provincial      | Provincial     |
| SMN-PostCG_L/SPL_L            | M2     | Provincial     | Provincial    | Provincial      | Provincial     |
| SMN-PreCG_R/SFG_R/SMA_R       | M2     | Provincial     | Connector     | Peripheral      | Peripheral     |
| SMN-PostCG_R/SPL_R            | M2     | Provincial     | Peripheral    | Provincial      | Provincial     |
| SMN-PostCG_L/IPL_L            | M2     | Connector      | Provincial    | Provincial      | Connector      |
| SMN-PreCG_L/PostCG_L          | M2     | Provincial     | Provincial    | Provincial      | Provincial     |
| SMN-PreCG_L/ParaCL_L          | M2     | Provincial     | Provincial    | Provincial      | Provincial     |
| SMN-PreCG_R/PostCG_R          | M2     | Provincial     | Provincial    | Provincial      | Peripheral     |
| SMN-PreCG_L                   | M2     | Peripheral     | Peripheral    | Peripheral      | Peripheral     |
| SMN-PostCG_L/SPL_L/Prec_L     | M2     | Peripheral     | Peripheral    | Peripheral      | Peripheral     |
| SMN-SMA_R/ParaCL_L/ParaCL_R   | M2     | Provincial     | Provincial    | Provincial      | Provincial     |
| SMN-SMA_L/SMA_R               | M2     | Provincial     | Provincial    | Provincial      | Provincial     |
| SMN-PreCG_R                   | M2     | Provincial     | Provincial    | Provincial      | Provincial     |
| SMN-PostCG_R/IPL_R            | M2     | Connector      | Peripheral    | Provincial      | Provincial     |
| SMN-PostCG_L                  | M2     | Peripheral     | Peripheral    | Peripheral      | Peripheral     |
| SMN-RolOper_R/Insula_R        | M2     | Peripheral     | Satellite     | Peripheral      | Peripheral     |
| SMN-PreCG_R/PostCG_R          | M2     | Provincial     | Peripheral    | Provincial      | Peripheral     |
| SMN-PostCG_L                  | M2     | Peripheral     | Peripheral    | Peripheral      | Peripheral     |
| SMN-PostCG_R                  | M2     | Peripheral     | Peripheral    | Peripheral      | Peripheral     |
| AUD-Insula_R/Heschl_R         | M2     | Connector      | Connector     | Provincial      | Connector      |
| AUD-STG_R                     | Mover  | Connector      | Satellite     | Provincial      | Provincial     |
| AUD-RolOper_R/STG_R           | M2     | Connector      | Connector     | Provincial      | Provincial     |

|                                 |    |            |            |            |            |
|---------------------------------|----|------------|------------|------------|------------|
| AUD-RolOper_L                   | M2 | Connector  | Connector  | Provincial | Provincial |
| AUD-RolOper_L/Smar_L/STG_L      | M2 | Provincial | Provincial | Provincial | Provincial |
| AUD-STG_L                       | M2 | Connector  | Connector  | Provincial | Connector  |
| AUD-RolOper_R                   | M2 | Peripheral | Peripheral | Peripheral | Peripheral |
| AUD-Smar_L                      | M2 | Satellite  | Satellite  | Peripheral | Peripheral |
| AUD-PostCG_L/Smar_L             | M2 | Satellite  | Satellite  | Peripheral | Peripheral |
| AUD-RolOper_L/PostCG_L/Heschl_L | M2 | Peripheral | Satellite  | Peripheral | Peripheral |
| AUD-RolOper_R                   | M2 | Satellite  | Satellite  | Peripheral | Peripheral |
| AUD-PostCG_R/Smar_R             | M2 | Peripheral | Provincial | Peripheral | Peripheral |
| AUD-Insula_L/Heschl_L           | M2 | Connector  | Satellite  | Connector  | Connector  |
| VIS-LingG_R/FuisG_R/Cerebellum  | M3 | Satellite  | Satellite  | Satellite  | Satellite  |
| VIS-MOG_R/MTG_R                 | M3 | Connector  | Connector  | Satellite  | Satellite  |
| VIS-Calc_R                      | M3 | Connector  | Connector  | Connector  | Connector  |
| VIS-Calc_L                      | M3 | Connector  | Connector  | Connector  | Connector  |
| VIS-MOG_L                       | M3 | Connector  | Connector  | Connector  | Connector  |
| VIS-Calc_R/LingG_R              | M3 | Satellite  | Satellite  | Satellite  | Satellite  |
| VIS-SOG_L/MOG_L                 | M3 | Satellite  | Connector  | Connector  | Connector  |
| VIS-LingG_R/FuisG_R             | M3 | Satellite  | Satellite  | Satellite  | Satellite  |
| VIS-LingG_L                     | M3 | Satellite  | Satellite  | Connector  | Connector  |
| VIS-Calc_L                      | M3 | Connector  | Connector  | Connector  | Connector  |
| VIS-IOG_R                       | M3 | Connector  | Connector  | Connector  | Connector  |
| VIS-IOG_L                       | M3 | Connector  | Connector  | Connector  | Connector  |
| VIS-Cuneus_L/SOG_L              | M3 | Satellite  | Connector  | Connector  | Connector  |
| VIS-Cuneus_R/SOG_R              | M3 | Connector  | Connector  | Peripheral | Connector  |
| VIS-SOG_R/MOG_R                 | M3 | Connector  | Connector  | Connector  | Connector  |
| VIS-Calc_R/LingG_R              | M3 | Satellite  | Satellite  | Satellite  | Satellite  |
| VIS-Cuneus_R                    | M3 | Connector  | Connector  | Peripheral | Connector  |
| VIS-LingG_L/Prec_L              | M3 | Connector  | Connector  | Connector  | Connector  |
| VIS-IOG_R/ITG_R                 | M3 | Connector  | Connector  | Satellite  | Connector  |
| VIS-SOG_R                       | M3 | Connector  | Connector  | Connector  | Connector  |
| VIS-Cuneus_R/Prec_R             | M3 | Connector  | Connector  | Satellite  | Connector  |
| VIS-MOG_L                       | M3 | Connector  | Satellite  | Connector  | Connector  |
| VIS-FuisG_R/Cerebellum          | M3 | Connector  | Connector  | Connector  | Connector  |
| VIS-Cuneus_L/SOG_L              | M3 | Connector  | Connector  | Peripheral | Connector  |
| VIS-Cuneus_L                    | M3 | Satellite  | Satellite  | Satellite  | Connector  |
| VIS-MOG_L/IOG_L                 | M3 | Satellite  | Satellite  | Satellite  | Connector  |
| VIS-MOG_R                       | M3 | Connector  | Connector  | Connector  | Connector  |
| VIS-Calc_R                      | M3 | Connector  | Satellite  | Satellite  | Connector  |
| VIS-MOG_L                       | M3 | Satellite  | Satellite  | Satellite  | Satellite  |
| VIS-IOG_L/FuisG_L               | M3 | Connector  | Connector  | Connector  | Connector  |

|                            |       |            |            |            |            |
|----------------------------|-------|------------|------------|------------|------------|
| VIS-MOG_R                  | M3    | Connector  | Connector  | Satellite  | Connector  |
| DMN-MOG_L/AngG_L           | Mover | Satellite  | Connector  | Satellite  | Satellite  |
| DMN-mIFGOrb_R              | M1    | Peripheral | Satellite  | Peripheral | Peripheral |
| DMN-mIFGOrb_R/Rectus_R     | M1    | Peripheral | Peripheral | Peripheral | Peripheral |
| DMN-HPC_L/LingG_L/Prec_L   | Mover | Satellite  | Satellite  | Satellite  | Satellite  |
| DMN-SFG_L                  | Mover | Peripheral | Peripheral | Satellite  | Satellite  |
| DMN-AngG_L/MTG_L           | M1    | Provincial | Provincial | Provincial | Provincial |
| DMN-MOG_R/AngG_R           | Mover | Satellite  | Satellite  | Satellite  | Connector  |
| DMN-mTP_L/ITG_L            | M1    | Peripheral | Peripheral | Peripheral | Peripheral |
| DMN-sTP_R/mTP_R            | M1    | Peripheral | Peripheral | Peripheral | Satellite  |
| DMN-MTG_L/ITG_L            | M1    | Provincial | Provincial | Peripheral | Peripheral |
| DMN-AngG_L                 | M1    | Provincial | Provincial | Provincial | Provincial |
| DMN-IPL_L/AngG_L           | M1    | Peripheral | Peripheral | Peripheral | Peripheral |
| DMN-PCC_L/Prec_L           | M1    | Peripheral | Provincial | Provincial | Provincial |
| DMN-Prec_R                 | M1    | Provincial | Provincial | Provincial | Connector  |
| DMN-Cuneus_L/Prec_L        | Mover | Peripheral | Peripheral | Provincial | Satellite  |
| DMN-PCC_L/Prec_L           | M1    | Provincial | Provincial | Connector  | Connector  |
| DMN-MCC_R/PCC_R            | M1    | Provincial | Provincial | Provincial | Provincial |
| DMN-Prec_R                 | Mover | Connector  | Satellite  | Connector  | Connector  |
| DMN-MCC_L                  | M1    | Provincial | Provincial | Connector  | Connector  |
| DMN-Prec_R                 | Mover | Peripheral | Peripheral | Peripheral | Satellite  |
| DMN-IPL_R/AngG_R           | M1    | Provincial | Provincial | Provincial | Provincial |
| DMN-SFG_R                  | M1    | Provincial | Provincial | Provincial | Provincial |
| DMN-SFG_L/mSFG_L           | M1    | Peripheral | Peripheral | Peripheral | Peripheral |
| DMN-SFG_L                  | M1    | Peripheral | Peripheral | Peripheral | Peripheral |
| DMN-MFG_L                  | M1    | Peripheral | Peripheral | Peripheral | Peripheral |
| DMN-SFG_R                  | M1    | Peripheral | Provincial | Connector  | Peripheral |
| DMN-SFG_R/mSFG_R           | M1    | Provincial | Peripheral | Connector  | Peripheral |
| DMN-SFG_L/mSFG_L           | M1    | Peripheral | Peripheral | Peripheral | Peripheral |
| DMN-SFG_L                  | M1    | Provincial | Provincial | Provincial | Provincial |
| DMN-mSFG_R/ACC_R           | M1    | Provincial | Provincial | Provincial | Provincial |
| DMN-mSFG_R                 | M1    | Provincial | Provincial | Peripheral | Provincial |
| DMN-mSFG_L/mIFGOrb_L/ACC_L | M1    | Peripheral | Provincial | Peripheral | Peripheral |
| DMN-mSFG_R                 | M1    | Provincial | Provincial | Provincial | Provincial |
| DMN-mIFGOrb_L/ACC_L        | M1    | Peripheral | Peripheral | Provincial | Provincial |
| DMN-mIFGOrb_R/ACC_R        | M1    | Peripheral | Peripheral | Provincial | Satellite  |
| DMN-mSFG_L/ACC_L           | M1    | Peripheral | Provincial | Peripheral | Peripheral |
| DMN-mSFG_L                 | M1    | Provincial | Provincial | Connector  | Provincial |
| DMN-mSFG_L/ACC_L           | M1    | Provincial | Provincial | Connector  | Connector  |
| DMN-SFG_L                  | M1    | Peripheral | Peripheral | Provincial | Peripheral |

|                                     |       |            |            |            |            |
|-------------------------------------|-------|------------|------------|------------|------------|
| DMN-mSFG_L                          | M1    | Peripheral | Peripheral | Peripheral | Peripheral |
| DMN-MTG_R                           | M1    | Peripheral | Provincial | Provincial | Peripheral |
| DMN-MTG_L                           | M1    | Provincial | Provincial | Provincial | Provincial |
| DMN-MTG_L                           | M1    | Provincial | Provincial | Provincial | Provincial |
| DMN-MTG_R                           | M1    | Provincial | Provincial | Connector  | Provincial |
| DMN-MTG_L                           | M1    | Provincial | Provincial | Provincial | Provincial |
| DMN-SFG_R/mSFG_R                    | M1    | Provincial | Provincial | Peripheral | Peripheral |
| DMN-ACC_R                           | Mover | Peripheral | Peripheral | Satellite  | Satellite  |
| DMN-STG_R/MTG_R                     | Mover | Satellite  | Satellite  | Peripheral | Satellite  |
| DMN-PHG_L                           | Mover | Peripheral | Satellite  | Satellite  | Satellite  |
| DMN-PHG_R/FuisG_R                   | Mover | Peripheral | Peripheral | Satellite  | Satellite  |
| DMN-FuisG_L/ITG_L                   | Mover | Satellite  | Satellite  | Satellite  | Satellite  |
| DMN-Cerebellum                      | Mover | Satellite  | Peripheral | Satellite  | Peripheral |
| DMN-MTG_R/mTP_R                     | M1    | Satellite  | Satellite  | Satellite  | Peripheral |
| DMN-MTG_L                           | M1    | Peripheral | Peripheral | Peripheral | Peripheral |
| DMN-AngG_R                          | M1    | Provincial | Provincial | Connector  | Provincial |
| DMN-MTG_L                           | M1    | Connector  | Provincial | Connector  | Connector  |
| DMN-IFGOrb_L/IOFC_L                 | M1    | Provincial | Peripheral | Provincial | Peripheral |
| DMN-IFGOrb_R/IOFC_R                 | M1    | Provincial | Peripheral | Satellite  | Peripheral |
| MEM-MCC_L/PCC_L                     | M1    | Peripheral | Peripheral | Connector  | Connector  |
| MEM-Prec_L                          | Mover | Connector  | Connector  | Connector  | Connector  |
| MEM-Prec_R                          | M4    | Satellite  | Connector  | Connector  | Connector  |
| MEM-Prec_R                          | Mover | Connector  | Connector  | Connector  | Connector  |
| MEM-MCC_L/MCC_R                     | Mover | Connector  | Connector  | Connector  | Connector  |
| CON-SMA_L                           | M2    | Connector  | Connector  | Provincial | Connector  |
| CON-Smar_R                          | M2    | Connector  | Provincial | Peripheral | Peripheral |
| CON-SFG_R/SMA_R                     | M2    | Satellite  | Provincial | Provincial | Provincial |
| CON-SFG_L                           | M2    | Connector  | Connector  | Provincial | Provincial |
| CON-MCC_L                           | M2    | Satellite  | Satellite  | Peripheral | Peripheral |
| CON-Putamen_R                       | Mover | Satellite  | Satellite  | Satellite  | Satellite  |
| CON-SFG_R/SMA_R                     | M2    | Satellite  | Satellite  | Peripheral | Peripheral |
| CON-SMA_R                           | Mover | Connector  | Connector  | Connector  | Connector  |
| CON-RolOper_L/Insula_L              | M2    | Satellite  | Satellite  | Peripheral | Peripheral |
| CON-IFGOper_R/RolOper_R/Insula_R    | Mover | Satellite  | Satellite  | Peripheral | Peripheral |
| CON-Insula_L                        | Mover | Satellite  | Connector  | Peripheral | Provincial |
| CON-IFGOper_L/RolOper_L/STG_L/sTP_L | Mover | Connector  | Connector  | Provincial | Provincial |
| CON-MCC_L                           | Mover | Connector  | Connector  | Connector  | Connector  |
| CON-Insula_R                        | Mover | Satellite  | Satellite  | Peripheral | Satellite  |
| FPN-PreCG_L                         | Mover | Connector  | Connector  | Connector  | Connector  |



|                         |       |            |            |            |            |
|-------------------------|-------|------------|------------|------------|------------|
| FPN-IFGTri_R            | Mover | Connector  | Provincial | Connector  | Connector  |
| FPN-IFGOper_L/IFGTri_L  | M4    | Connector  | Connector  | Connector  | Connector  |
| FPN-IPL_L               | M1    | Provincial | Provincial | Connector  | Provincial |
| FPN-SFG_L/MFG_L         | Mover | Satellite  | Peripheral | Satellite  | Satellite  |
| FPN-ITG_R               | M4    | Connector  | Connector  | Connector  | Connector  |
| FPN-aOFC_R              | Mover | Satellite  | Satellite  | Satellite  | Satellite  |
| FPN-MFG_R/aOFC_R        | Mover | Satellite  | Peripheral | Satellite  | Peripheral |
| FPN-PreCG_R/IFGOper_R   | Mover | Connector  | Connector  | Connector  | Connector  |
| FPN-PreCG_L/MFG_L       | Mover | Connector  | Provincial | Connector  | Satellite  |
| FPN-MFG_L/IFGTri_L      | Mover | Connector  | Connector  | Connector  | Connector  |
| FPN-MFG_R               | Mover | Connector  | Connector  | Connector  | Connector  |
| FPN-IPL_R/Smar_R        | Mover | Satellite  | Satellite  | Satellite  | Connector  |
| FPN-SPL_L/IPL_L         | M4    | Connector  | Connector  | Connector  | Connector  |
| FPN-IPL_R               | Mover | Provincial | Satellite  | Connector  | Connector  |
| FPN-SFG_R/MFG_R         | Mover | Provincial | Provincial | Connector  | Connector  |
| FPN-SOG_R/MOG_R/AngG_R  | Mover | Satellite  | Satellite  | Connector  | Connector  |
| FPN-IPL_L/AngG_L        | Mover | Provincial | Provincial | Connector  | Connector  |
| FPN-MFG_R               | Mover | Provincial | Peripheral | Satellite  | Provincial |
| FPN-SFG_L/MFG_L         | Mover | Provincial | Peripheral | Satellite  | Provincial |
| FPN-MFG_L/IFGOrb_L      | Mover | Peripheral | Peripheral | Satellite  | Provincial |
| FPN-IPL_R/AngG_R        | M4    | Satellite  | Satellite  | Satellite  | Connector  |
| FPN-MFG_R/IFGOrb_R      | Mover | Provincial | Peripheral | Satellite  | Connector  |
| FPN-MFG_L/IFGTri_L      | Mover | Satellite  | Provincial | Satellite  | Connector  |
| FPN-SMA_L/mSFG_L        | Mover | Provincial | Provincial | Satellite  | Connector  |
| DAN-Prec_R              | Mover | Satellite  | Connector  | Connector  | Connector  |
| DAN-MTG_L               | Mover | Connector  | Connector  | Provincial | Connector  |
| DAN-SOG_R/SPL_R/AngG_R  | Mover | Satellite  | Connector  | Connector  | Connector  |
| DAN-MTG_R               | Mover | Connector  | Connector  | Provincial | Satellite  |
| DAN-SPL_R               | Mover | Connector  | Connector  | Connector  | Connector  |
| DAN-IPL_L               | M4    | Satellite  | Satellite  | Satellite  | Connector  |
| DAN-SOG_L/MOG_L/IPL_L   | M4    | Connector  | Connector  | Connector  | Connector  |
| DAN-PreCG_L/MFG_L       | M4    | Satellite  | Satellite  | Connector  | Connector  |
| DAN-IOG_L/ITG_L         | M3    | Satellite  | Connector  | Connector  | Connector  |
| DAN-SPL_L/Prec_L        | M2    | Connector  | Connector  | Provincial | Connector  |
| DAN-PreCG_R/SFG_R/MFG_R | M2    | Connector  | Connector  | Provincial | Provincial |
| VAN-SMA_L               | M1    | Connector  | Connector  | Satellite  | Connector  |
| VAN-Smar_R/STG_R        | Mover | Connector  | Connector  | Connector  | Connector  |
| VAN-STG_L/MTG_L         | Mover | Connector  | Connector  | Connector  | Connector  |
| VAN-STG_L               | Mover | Satellite  | Satellite  | Satellite  | Satellite  |
| VAN-STG_R               | Mover | Satellite  | Satellite  | Satellite  | Satellite  |

|                                |       |            |            |            |            |
|--------------------------------|-------|------------|------------|------------|------------|
| VAN-STG_R/MTG_R                | Mover | Connector  | Satellite  | Satellite  | Connector  |
| VAN-STG_R/MTG_R                | Mover | Connector  | Connector  | Connector  | Connector  |
| VAN-IFGTri_R                   | Mover | Connector  | Connector  | Satellite  | Satellite  |
| VAN-IFGTri_L                   | M1    | Provincial | Provincial | Peripheral | Provincial |
| SAN-MCC_R/Prec_R/ParaCL_R      | Mover | Connector  | Connector  | Provincial | Provincial |
| SAN-IPL_R/Smar_R               | Mover | Satellite  | Connector  | Satellite  | Connector  |
| SAN-PreCG_R                    | Mover | Connector  | Connector  | Connector  | Connector  |
| SAN-MFG_R                      | Mover | Connector  | Connector  | Connector  | Connector  |
| SAN-IFGOper_R/IFGTri_R         | Mover | Satellite  | Satellite  | Satellite  | Satellite  |
| SAN-IFGTri_L/Insula_L          | Mover | Satellite  | Satellite  | Satellite  | Satellite  |
| SAN-Insula_R                   | Mover | Satellite  | Satellite  | Satellite  | Satellite  |
| SAN-IFGTri_R/IFGOrb_R/Insula_R | Mover | Satellite  | Satellite  | Satellite  | Satellite  |
| SAN-Insula_R                   | Mover | Peripheral | Peripheral | Satellite  | Satellite  |
| SAN-ACC_L                      | Mover | Satellite  | Satellite  | Satellite  | Satellite  |
| SAN-SMA_L/mSFG_L/MCC_L         | Mover | Connector  | Connector  | Connector  | Connector  |
| SAN-SFG_L/MFG_L                | Mover | Connector  | Provincial | Connector  | Connector  |
| SAN-ACC_L/ACC_R/MCC_R          | Mover | Connector  | Connector  | Connector  | Connector  |
| SAN-mSFG_L/MCC_L/MCC_R         | Mover | Connector  | Connector  | Connector  | Connector  |
| SAN-ACC_R/MCC_R                | Mover | Satellite  | Satellite  | Satellite  | Satellite  |
| SAN-SFG_R                      | Mover | Connector  | Connector  | Satellite  | Satellite  |
| SAN-SFG_R/MFG_R                | Mover | Connector  | Connector  | Connector  | Connector  |
| SAN-MFG_L                      | Mover | Satellite  | Satellite  | Satellite  | Satellite  |
| MEM-HPC_L                      | Mover | Peripheral | Satellite  | Satellite  | Satellite  |
| MEM-HPC_R                      | Mover | Peripheral | Satellite  | Peripheral | Satellite  |
| MEM-PHG_L                      | Mover | Peripheral | Satellite  | Satellite  | Satellite  |
| MEM-PHG_R                      | Mover | Connector  | Connector  | Connector  | Peripheral |

**SI Table 1:** *Node locations, modular assignment, and identity*

Each row contains the assigned resting-state network from the Power Atlas and anatomical location from the AAL atlas (column 1), the data-driven module assignment (column 2), and the node identity for spatial encoding (column 3), temporal encoding (column 4), spatial retrieval (column 5), and temporal retrieval (column 6) for all 223 nodes in the networks.
